# Supplementary material for: The general version of Hamilton’s rule
Source: eLife. 2025 Sep 12;14:RP105065. doi: 10.7554/eLife.105065 (PMC12431776; doi:10.7554/eLife.105065)
Supplement: Figure 1—source data 1. [file elife-105065-fig1-data1.xlsx]

## Sheet: Linear
Independent variable x	Dependent variable	The dependent variable is generated by drawing from a binomial distribution with 10 trials and succes probability 0.1(1 + x), where x is the dependent variable
0	1
0	0
0	0
0	3
0	0
0	0
0	0
0	1
0	0
0	1
0	1
0	2
0	3
0	0
0	0
0	3
0	0
0	0
0	1
0	0
0	1
0	1
0	0
0	1
0	2
0	2
0	0
0	0
0	2
0	0
0	1
0	0
0	0
0	1
0	1
0	0
0	2
0	1
0	0
0	1
0	0
0	3
0	1
0	1
0	1
0	2
0	1
0	3
0	1
0	1
0	0
0	1
0	1
0	1
0	0
0	0
0	1
0	2
0	2
0	0
0	1
0	1
0	0
0	0
0	0
0	0
0	1
0	0
0	1
0	1
0	1
0	4
0	2
0	0
0	0
0	1
0	2
0	0
0	0
0	1
0	1
0	1
0	1
0	1
0	0
0	3
0	0
0	0
0	0
0	0
0	0
0	1
0	0
0	1
0	1
0	0
0	2
0	2
0	2
0	0
0	2
0	1
0	1
0	0
0	1
0	1
0	1
0	1
0	1
0	1
0	1
0	0
0	1
0	0
0	1
0	1
0	1
0	1
0	0
0	0
0	1
0	1
0	0
0	0
0	1
0	1
0	1
0	0
0	2
0	0
0	0
0	0
0	1
0	0
0	0
0	1
0	0
0	0
0	3
0	0
0	1
0	2
0	2
0	0
0	1
0	0
0	1
0	0
0	1
0	3
0	0
0	0
0	1
0	1
0	3
0	2
0	0
0	2
0	1
0	2
0	1
0	1
0	1
0	3
0	1
0	3
0	2
0	2
0	0
0	2
0	0
0	0
0	2
0	0
0	0
0	1
0	1
0	0
0	2
0	2
0	1
0	0
0	0
0	1
0	2
0	2
0	1
0	3
0	0
0	0
0	0
0	2
0	0
0	1
0	0
0	2
0	0
0	3
0	0
0	1
0	1
0	3
0	0
0	0
0	0
0	2
0	0
0	0
0	0
0	1
0	0
0	1
0	0
0	0
0	0
0	0
0	0
0	3
0	2
0	1
0	1
0	0
0	3
0	0
0	0
0	1
0	2
0	0
0	3
0	1
0	3
0	1
0	0
0	1
0	0
0	1
0	2
0	0
0	2
0	2
0	0
0	2
0	1
0	1
0	1
0	1
0	1
0	1
0	0
0	0
0	0
0	2
0	1
0	0
0	3
0	1
0	2
0	0
0	1
0	3
0	1
0	4
0	3
0	2
0	0
0	1
0	2
0	0
0	0
0	3
0	2
0	2
0	3
0	1
0	1
0	3
0	0
0	1
0	1
0	2
0	1
0	0
0	0
0	2
0	2
0	1
0	0
0	2
0	1
0	0
0	3
0	0
0	0
0	4
0	0
0	0
0	0
0	1
0	2
0	0
0	0
0	0
0	0
0	0
0	1
0	2
0	0
0	1
0	1
0	0
0	1
0	1
0	0
0	0
0	2
0	3
0	0
0	0
0	4
0	2
0	3
0	1
0	1
0	1
0	1
0	2
0	1
0	2
0	0
0	1
0	0
0	1
0	0
0	1
0	1
0	3
0	0
0	1
0	1
0	1
0	0
0	1
0	1
0	0
0	0
0	2
0	3
0	1
0	0
0	1
0	1
0	0
0	0
0	1
0	2
0	2
0	1
0	2
0	0
0	1
0	1
0	0
0	1
0	3
0	0
0	1
0	0
0	2
0	0
0	0
0	1
0	0
0	3
0	0
0	1
0	1
0	1
0	1
0	0
0	1
0	2
0	0
0	2
0	3
0	2
0	0
0	1
0	0
0	0
0	0
0	2
0	0
0	0
0	1
0	2
0	1
0	0
0	1
0	0
0	1
0	1
0	0
0	0
0	0
0	1
0	1
0	0
0	2
0	2
0	0
0	0
0	2
0	1
0	0
0	1
0	2
0	0
0	1
0	0
0	2
0	0
0	3
0	1
0	2
0	3
0	1
0	2
0	2
0	2
0	0
0	1
0	0
0	2
0	0
0	2
0	0
0	2
0	2
0	1
0	1
0	0
0	2
0	0
0	0
0	0
0	1
0	2
0	1
0	1
0	2
0	1
0	0
0	1
0	2
0	0
0	1
0	1
0	1
0	1
0	1
0	1
0	3
0	1
0	3
0	1
0	2
0	1
0	0
0	0
0	1
0	0
0	2
0	2
0	3
0	0
0	1
0	0
0	1
0	0
0	1
0	0
0	0
0	0
0	1
0	3
0	1
0	2
0	2
0	1
0	2
0	0
0	2
0	0
0	2
0	1
0	2
0	1
0	3
0	1
0	0
0	2
0	2
0	1
0	1
0	0
0	2
0	1
0	0
0	1
0	1
0	1
0	0
0	2
0	0
0	1
0	1
0	2
0	2
0	2
0	0
0	3
0	2
0	0
0	0
0	1
0	1
0	2
0	0
0	2
0	0
0	0
0	3
0	1
0	0
0	4
0	1
0	1
0	1
0	2
0	1
0	0
0	0
0	4
0	1
0	1
0	3
0	0
0	3
0	0
0	0
0	1
0	2
0	1
0	1
0	0
0	2
0	1
0	1
0	0
0	2
0	0
0	1
0	0
0	1
0	1
0	1
0	1
0	1
0	0
0	2
0	0
0	2
0	0
0	3
0	2
0	0
0	1
0	0
0	1
0	1
0	0
0	0
0	0
0	3
0	0
0	2
0	1
0	0
0	0
0	0
0	4
0	2
0	0
0	0
0	2
0	0
0	1
0	0
0	0
0	0
0	0
0	0
0	0
0	1
0	2
0	1
0	0
0	2
0	1
0	1
0	1
0	1
0	1
0	3
0	0
0	0
0	1
0	0
0	1
0	2
0	0
0	2
0	1
0	1
0	0
0	0
0	1
0	2
0	2
0	1
0	1
0	1
0	2
0	1
0	0
0	0
0	1
0	1
0	1
0	1
0	1
0	2
0	2
0	1
0	4
0	0
0	1
0	1
0	2
0	2
0	0
0	1
0	0
0	3
0	3
0	2
0	0
0	0
0	2
0	2
0	1
0	0
0	2
0	1
0	1
0	0
0	1
0	2
0	1
0	0
0	0
0	0
0	1
0	1
0	3
0	1
0	0
0	2
0	1
0	0
0	2
0	0
0	1
0	1
0	3
0	3
0	0
0	2
0	1
0	0
0	1
0	3
0	3
0	0
0	2
0	0
0	1
0	1
0	0
0	2
0	0
0	2
0	0
0	2
0	0
0	0
0	4
0	0
0	1
0	1
0	1
0	3
0	3
0	0
0	2
0	1
0	0
0	1
0	0
0	1
0	1
0	1
0	1
0	1
0	1
0	2
0	0
0	1
0	1
0	3
0	0
0	1
0	1
0	1
0	0
0	2
0	1
0	2
0	0
0	0
0	1
0	1
0	1
0	0
0	0
0	1
0	2
0	1
0	1
0	2
0	1
0	2
0	0
0	0
0	2
0	1
0	0
0	1
0	1
0	0
0	1
0	2
0	0
0	1
0	2
0	0
0	2
0	1
0	2
0	0
0	1
0	0
0	0
0	1
0	1
0	0
0	2
0	2
0	1
0	1
0	3
0	3
0	5
0	1
0	0
0	0
0	0
0	2
0	0
0	0
0	1
0	1
0	3
0	1
0	1
0	1
0	2
0	2
0	1
0	1
0	1
0	1
0	3
0	0
0	1
0	1
0	3
0	0
0	1
0	3
0	0
0	1
0	1
0	2
0	3
0	1
0	1
0	2
0	1
0	1
0	1
0	1
0	2
0	2
0	2
0	0
0	0
0	2
0	0
0	3
0	0
0	1
0	1
0	1
0	1
0	1
0	0
0	0
0	0
0	0
0	3
0	0
0	0
0	1
0	1
0	1
0	0
0	1
0	2
0	0
0	0
0	0
0	1
0	0
0	3
0	2
0	1
0	1
0	0
0	2
0	1
0	2
0	0
0	1
0	0
0	0
0	1
0	1
0	1
0	2
0	2
0	1
0	1
0	1
0	2
0	4
0	0
0	2
0	1
0	1
0	0
0	0
0	2
0	0
0	0
0	0
0	1
0	2
0	2
0	0
0	2
0	0
0	0
0	1
0	1
0	0
0	0
0	0
0	2
0	0
0	0
0	0
0	0
0	2
0	0
0	2
0	1
0	1
0	0
0	0
0	3
0	0
0	1
0	2
0	0
0	2
0	0
0	1
0	2
0	2
0	2
0	1
0	1
0	0
0	1
0	2
0	1
0	0
0	0
0	2
0	0
0	1
0	0
0	0
0	0
0	0
0	1
0	1
0	0
0	0
0	2
0	0
0	2
0	0
0	2
0	4
0	2
0	0
0	1
0	0
0	1
0	3
0	2
0	3
0	2
0	0
0	2
0	1
0	1
0	1
0	1
0	2
0	2
0	2
0	1
0	0
0	1
0	2
0	1
0	1
0	0
0	3
0	1
0	0
0	0
0	0
0	2
0	0
0	0
0	0
0	0
0	1
0	0
0	3
0	3
0	1
0	0
0	1
0	0
0	1
0	0
0	0
0	1
0	1
0	1
0	1
0	0
0	0
0	1
0	1
0	1
0	4
0	1
0	1
0	1
0	0
0	1
0	0
0	2
0	2
0	0
0	1
0	0
0	0
0	1
0	1
0	1
0	0
0	1
0	1
0	1
0	0
0	2
0	3
0	1
0	1
0	3
0	1
0	0
0	1
0	2
0	1
0	0
0	0
0	0
0	1
0	0
0	2
0	2
0	0
0	1
0	3
0	1
0	2
0	1
0	0
0	0
0	1
0	1
0	1
0	1
0	1
0	1
0	1
0	0
0	0
0	2
0	1
0	2
0	0
0	0
0	0
0	2
0	1
0	0
0	1
0	0
0	1
0	2
0	1
0	1
0	0
0	1
0	2
0	0
0	1
0	2
0	0
0	2
0	0
0	1
0	1
0	1
0	1
0	0
0	1
0	0
0	2
0	2
0	2
0	3
0	0
0	0
0	0
0	1
0	0
0	1
0	0
0	1
0	0
0	2
0	1
0	1
0	0
0	1
0	0
0	1
0	1
0	0
0	0
0	1
0	1
0	1
0	2
0	0
0	1
0	4
0	1
0	4
0	3
0	1
0	1
0	0
0	2
0	2
0	0
0	0
0	0
0	2
0	1
0	1
0	1
0	1
0	0
0	1
0	1
0	0
0	1
0	1
0	0
0	1
0	0
0	1
0	0
0	1
0	0
0	0
0	1
0	0
0	0
0	2
0	0
0	0
0	1
0	1
0	0
0	2
0	3
0	2
0	0
0	1
0	1
0	0
0	0
0	0
0	1
0	2
0	0
0	3
0	1
0	0
0	0
0	1
0	0
0	1
0	0
0	1
0	2
0	0
0	2
0	2
0	1
0	0
0	2
0	2
0	1
0	2
0	2
0	1
0	0
0	1
0	2
0	3
0	2
0	0
0	1
0	2
0	1
0	0
0	0
0	2
0	0
0	1
0	0
0	2
0	1
0	2
0	3
0	2
0	0
0	1
0	1
0	2
0	0
0	1
0	1
0	0
0	1
0	0
0	0
0	1
0	1
0	0
0	2
0	1
0	2
0	2
0	0
0	1
0	0
0	0
0	4
0	0
0	1
0	1
0	0
0	0
0	1
0	2
0	3
0	1
0	3
0	0
0	1
0	0
0	0
0	2
0	4
0	0
0	1
0	2
0	1
0	0
0	1
0	3
0	1
0	0
0	1
0	1
0	0
0	2
0	0
0	0
0	2
0	0
0	1
0	0
0	2
0	1
0	2
0	1
0	1
0	2
0	0
0	2
0	1
0	1
0	1
0	2
0	0
0	1
0	4
0	0
0	2
0	2
0	2
0	0
0	1
0	1
0	0
0	2
0	0
0	0
0	1
0	1
0	3
0	2
0	0
0	2
0	1
0	1
0	1
0	0
0	0
0	1
0	1
0	3
0	0
0	2
0	2
0	1
0	3
0	0
0	0
0	2
0	2
0	0
0	3
0	1
0	2
0	0
0	1
0	1
0	2
0	1
0	0
0	1
0	0
0	1
0	1
0	0
0	2
0	0
0	1
0	0
0	0
0	1
0	0
0	0
0	2
0	0
0	4
0	1
0	0
0	1
0	3
0	0
0	2
0	0
0	3
0	1
0	0
0	1
0	2
0	0
0	2
0	0
0	0
0	0
0	1
0	2
0	1
0	0
0	0
0	0
0	2
0	2
0	0
0	1
0	3
0	0
0	2
0	1
0	1
0	0
0	1
0	0
0	0
0	3
0	0
0	1
0	5
0	3
0	0
0	2
0	2
0	1
0	0
0	1
0	2
0	1
0	4
0	1
0	1
0	2
0	0
0	0
0	0
0	1
0	0
0	1
0	1
0	2
0	2
0	1
0	1
0	1
0	1
0	5
0	2
0	1
0	1
0	0
0	0
0	2
0	1
0	3
0	1
0	0
0	0
0	2
0	0
0	2
0	0
0	3
0	0
0	2
0	0
0	1
0	0
0	1
0	0
0	0
0	2
0	3
0	2
0	3
0	2
0	1
0	1
0	0
0	0
0	1
0	0
0	2
0	1
0	1
0	1
0	1
0	1
0	1
0	1
0	0
0	2
0	0
0	1
0	3
0	2
0	1
0	1
0	3
0	2
0	3
0	0
0	0
0	0
0	1
0	0
0	0
0	2
0	2
0	1
0	0
0	0
0	1
0	0
0	2
0	2
0	1
0	1
0	2
0	1
0	1
0	0
0	0
0	1
0	3
0	0
0	2
0	1
0	2
0	1
0	0
0	0
0	1
0	2
0	0
0	2
0	2
0	0
0	2
0	2
0	1
0	1
0	1
0	2
0	1
0	0
0	1
0	0
0	0
0	1
0	1
0	0
0	3
0	2
0	1
0	2
0	0
0	1
0	1
0	1
0	2
0	0
0	1
0	2
0	0
0	3
0	0
0	0
0	2
0	1
0	1
0	0
0	2
0	1
0	1
0	1
0	0
0	1
0	0
0	1
0	1
0	2
0	0
0	0
0	0
0	2
0	1
0	1
0	0
0	0
0	0
0	1
0	1
0	2
0	1
0	0
0	2
0	1
0	1
0	0
0	0
0	2
0	1
0	0
0	0
0	1
0	2
0	1
0	1
0	3
0	2
0	0
0	2
0	1
0	2
0	3
0	1
0	0
0	1
0	1
0	0
0	0
0	2
0	1
0	0
0	1
0	1
0	0
0	3
0	0
0	0
0	0
0	2
0	0
0	0
0	1
0	2
0	0
0	3
0	0
0	1
0	1
0	2
0	1
0	0
0	2
0	1
0	2
0	3
0	0
0	2
0	1
0	1
0	1
0	0
0	0
0	0
0	2
0	3
0	1
0	0
0	0
0	1
0	0
0	0
0	1
0	0
0	1
0	0
0	0
0	0
0	0
0	0
0	0
0	1
0	2
0	2
0	0
0	1
0	0
0	1
0	4
0	1
0	1
0	3
0	1
0	2
0	0
0	1
0	2
0	0
0	1
0	0
0	0
0	1
0	0
0	0
0	4
0	1
0	0
0	1
0	2
0	1
0	0
0	0
0	0
0	3
0	1
0	2
0	2
0	0
0	0
0	1
0	2
0	0
0	0
0	3
0	1
0	0
0	2
0	2
0	1
0	0
0	1
0	0
0	1
0	2
0	0
0	3
0	1
0	1
0	0
0	1
0	2
0	1
0	2
0	1
0	0
0	2
0	3
0	0
0	1
0	2
0	3
0	1
0	1
0	0
0	1
0	0
0	2
0	2
0	0
0	1
0	0
0	3
0	1
0	1
0	1
0	1
0	2
0	1
0	1
0	2
0	1
0	0
0	2
0	1
0	2
0	0
0	2
0	1
0	1
0	2
0	0
0	0
0	0
0	1
0	1
0	2
0	1
0	4
0	1
0	1
0	0
0	1
0	1
0	2
0	1
0	1
0	0
0	0
0	0
0	0
0	2
0	0
0	2
0	0
0	0
0	0
0	1
0	0
0	0
0	1
0	1
0	0
0	3
0	2
0	0
0	0
0	0
0	0
0	0
0	0
0	4
0	2
0	3
0	0
0	1
0	1
0	1
0	1
0	1
0	0
0	1
0	1
0	2
0	1
0	1
0	3
0	2
0	1
0	1
0	2
0	2
0	2
0	2
0	2
0	2
0	0
0	1
0	1
0	1
0	2
0	1
0	0
0	0
0	0
0	1
0	1
0	0
0	0
0	0
0	1
0	1
0	1
0	1
0	3
0	1
0	1
0	1
0	1
0	1
0	0
0	0
0	0
0	0
0	1
0	2
0	2
0	1
0	0
0	1
0	1
0	2
0	0
0	2
0	0
0	0
0	2
0	3
0	1
0	0
0	2
0	3
0	1
0	0
0	1
0	0
0	0
0	0
0	0
0	1
0	1
0	0
0	2
0	1
0	1
0	0
0	1
0	1
0	2
0	1
0	1
0	1
0	1
0	1
0	3
0	3
0	2
0	4
0	1
0	0
0	2
0	1
0	0
0	0
0	0
0	1
0	1
0	1
0	1
0	1
0	0
0	0
0	2
0	2
0	2
0	0
0	1
0	1
0	1
0	1
0	1
0	1
0	1
0	2
0	0
0	0
0	2
0	0
0	0
0	1
0	0
0	0
0	0
0	0
0	0
0	2
0	2
0	1
0	0
0	1
0	0
0	1
0	1
0	2
0	1
0	1
0	0
0	0
0	0
0	0
0	1
0	0
0	1
0	0
0	0
0	1
0	1
0	2
0	0
0	1
0	1
0	0
0	1
0	1
0	1
0	2
0	1
0	2
0	1
0	0
0	1
0	0
0	1
0	0
0	3
0	2
0	1
0	0
0	2
0	1
0	3
0	1
0	1
0	1
0	0
0	3
0	1
0	3
0	2
0	0
0	1
0	0
0	0
0	2
0	0
0	2
0	2
0	1
0	2
0	3
0	1
0	0
0	1
0	1
0	2
0	2
0	0
0	1
0	2
0	0
0	1
0	0
0	2
0	1
0	0
0	1
0	1
0	0
0	1
0	0
0	0
0	1
0	1
0	4
0	2
[truncated: 25,514 more rows]

## Sheet: Quadratic
Independent variable x	Dependent variable		The dependent variable is generated by drawing from a binomial distribution with 10 trials and succes probability 0.1(1 + (x)^2), where x is the dependent variable
0	1
0	1
0	2
0	2
0	1
0	0
0	2
0	0
0	1
0	0
0	0
0	2
0	0
0	0
0	0
0	0
0	1
0	0
0	2
0	1
0	0
0	4
0	1
0	2
0	0
0	0
0	4
0	1
0	1
0	0
0	0
0	1
0	3
0	2
0	0
0	1
0	2
0	2
0	1
0	0
0	0
0	0
0	0
0	1
0	0
0	0
0	3
0	0
0	1
0	0
0	2
0	1
0	0
0	1
0	0
0	0
0	6
0	0
0	1
0	0
0	0
0	1
0	1
0	4
0	1
0	0
0	1
0	2
0	1
0	1
0	2
0	1
0	0
0	0
0	2
0	0
0	2
0	0
0	1
0	1
0	1
0	0
0	1
0	0
0	2
0	0
0	1
0	0
0	0
0	2
0	1
0	3
0	0
0	1
0	2
0	1
0	1
0	0
0	1
0	0
0	1
0	0
0	1
0	0
0	2
0	1
0	0
0	1
0	1
0	1
0	2
0	0
0	2
0	0
0	1
0	2
0	0
0	1
0	1
0	1
0	0
0	0
0	1
0	1
0	1
0	1
0	1
0	3
0	0
0	0
0	0
0	1
0	2
0	3
0	1
0	1
0	0
0	1
0	1
0	0
0	0
0	1
0	2
0	1
0	0
0	1
0	1
0	0
0	1
0	0
0	1
0	1
0	1
0	0
0	1
0	0
0	0
0	2
0	0
0	0
0	1
0	1
0	0
0	0
0	1
0	1
0	1
0	1
0	2
0	1
0	1
0	1
0	3
0	0
0	1
0	1
0	1
0	1
0	2
0	1
0	0
0	0
0	2
0	1
0	1
0	2
0	2
0	2
0	1
0	0
0	2
0	1
0	0
0	1
0	1
0	2
0	1
0	1
0	0
0	2
0	2
0	1
0	1
0	1
0	1
0	1
0	0
0	2
0	1
0	2
0	1
0	1
0	1
0	0
0	0
0	0
0	2
0	2
0	1
0	3
0	2
0	1
0	0
0	1
0	1
0	1
0	1
0	2
0	1
0	1
0	1
0	0
0	0
0	2
0	2
0	0
0	2
0	0
0	1
0	1
0	0
0	0
0	2
0	2
0	0
0	0
0	1
0	2
0	1
0	0
0	2
0	0
0	1
0	1
0	2
0	3
0	1
0	3
0	1
0	1
0	0
0	2
0	1
0	1
0	0
0	1
0	0
0	0
0	0
0	2
0	2
0	1
0	0
0	3
0	0
0	1
0	0
0	2
0	0
0	0
0	1
0	2
0	3
0	0
0	2
0	1
0	0
0	1
0	1
0	2
0	0
0	2
0	2
0	0
0	1
0	0
0	3
0	3
0	2
0	1
0	2
0	1
0	0
0	1
0	1
0	0
0	1
0	3
0	0
0	0
0	0
0	3
0	2
0	0
0	3
0	0
0	1
0	0
0	0
0	1
0	0
0	1
0	0
0	1
0	1
0	0
0	2
0	1
0	1
0	1
0	0
0	1
0	1
0	1
0	2
0	0
0	3
0	1
0	0
0	0
0	1
0	1
0	1
0	1
0	2
0	0
0	1
0	1
0	2
0	3
0	2
0	2
0	1
0	1
0	0
0	1
0	1
0	1
0	0
0	2
0	1
0	1
0	1
0	1
0	0
0	0
0	1
0	4
0	1
0	2
0	1
0	0
0	3
0	2
0	0
0	2
0	1
0	3
0	1
0	1
0	2
0	2
0	0
0	0
0	1
0	2
0	0
0	0
0	1
0	0
0	0
0	2
0	2
0	1
0	1
0	1
0	0
0	0
0	0
0	0
0	2
0	0
0	2
0	1
0	1
0	2
0	1
0	0
0	1
0	0
0	0
0	2
0	0
0	2
0	1
0	2
0	1
0	1
0	0
0	1
0	1
0	0
0	0
0	0
0	0
0	2
0	1
0	1
0	1
0	2
0	3
0	1
0	1
0	1
0	2
0	0
0	2
0	1
0	1
0	2
0	0
0	0
0	1
0	0
0	0
0	0
0	0
0	2
0	1
0	1
0	1
0	1
0	2
0	0
0	0
0	0
0	2
0	2
0	1
0	0
0	1
0	2
0	2
0	2
0	0
0	0
0	1
0	1
0	1
0	0
0	0
0	1
0	1
0	0
0	1
0	0
0	0
0	0
0	1
0	1
0	0
0	1
0	1
0	3
0	1
0	0
0	1
0	0
0	0
0	1
0	1
0	1
0	3
0	0
0	1
0	0
0	1
0	1
0	1
0	1
0	1
0	1
0	1
0	2
0	3
0	2
0	2
0	1
0	0
0	1
0	0
0	0
0	1
0	2
0	1
0	1
0	1
0	1
0	0
0	1
0	2
0	3
0	0
0	2
0	1
0	1
0	2
0	1
0	1
0	1
0	0
0	1
0	1
0	0
0	2
0	0
0	1
0	0
0	1
0	2
0	1
0	0
0	2
0	0
0	0
0	3
0	2
0	1
0	1
0	0
0	2
0	0
0	1
0	0
0	0
0	0
0	1
0	0
0	3
0	1
0	1
0	0
0	0
0	1
0	1
0	0
0	0
0	4
0	2
0	1
0	1
0	2
0	2
0	0
0	2
0	1
0	2
0	0
0	1
0	1
0	1
0	0
0	2
0	1
0	1
0	1
0	0
0	1
0	0
0	1
0	0
0	1
0	2
0	1
0	0
0	1
0	1
0	2
0	2
0	0
0	0
0	1
0	0
0	1
0	0
0	1
0	2
0	0
0	1
0	2
0	0
0	0
0	1
0	1
0	0
0	1
0	0
0	1
0	1
0	2
0	2
0	0
0	0
0	0
0	0
0	1
0	0
0	0
0	2
0	1
0	0
0	0
0	1
0	2
0	1
0	1
0	1
0	1
0	0
0	1
0	0
0	1
0	1
0	1
0	2
0	3
0	0
0	1
0	1
0	0
0	1
0	0
0	1
0	1
0	4
0	0
0	2
0	0
0	0
0	0
0	2
0	3
0	2
0	1
0	3
0	0
0	0
0	1
0	2
0	1
0	1
0	0
0	1
0	1
0	1
0	4
0	0
0	5
0	0
0	1
0	2
0	1
0	1
0	2
0	0
0	1
0	0
0	0
0	0
0	2
0	2
0	0
0	1
0	0
0	1
0	0
0	1
0	1
0	3
0	1
0	3
0	0
0	2
0	0
0	2
0	1
0	1
0	0
0	0
0	1
0	0
0	2
0	2
0	3
0	0
0	0
0	1
0	0
0	2
0	0
0	0
0	0
0	2
0	2
0	2
0	0
0	1
0	1
0	0
0	0
0	1
0	1
0	1
0	4
0	0
0	2
0	1
0	2
0	0
0	1
0	2
0	0
0	0
0	2
0	0
0	2
0	1
0	2
0	0
0	3
0	1
0	0
0	2
0	1
0	1
0	1
0	0
0	1
0	0
0	2
0	0
0	1
0	0
0	1
0	1
0	2
0	2
0	1
0	0
0	1
0	2
0	1
0	1
0	0
0	1
0	2
0	1
0	1
0	1
0	4
0	0
0	2
0	0
0	2
0	1
0	0
0	1
0	0
0	2
0	1
0	1
0	0
0	2
0	0
0	3
0	3
0	0
0	2
0	2
0	0
0	1
0	2
0	2
0	0
0	1
0	3
0	1
0	0
0	1
0	3
0	0
0	0
0	1
0	2
0	2
0	0
0	0
0	1
0	0
0	1
0	3
0	1
0	1
0	1
0	3
0	0
0	1
0	2
0	1
0	0
0	0
0	2
0	1
0	2
0	1
0	1
0	0
0	0
0	0
0	0
0	3
0	3
0	1
0	1
0	0
0	1
0	3
0	2
0	1
0	1
0	1
0	1
0	1
0	0
0	1
0	2
0	2
0	1
0	2
0	2
0	0
0	1
0	0
0	3
0	0
0	1
0	0
0	0
0	0
0	0
0	0
0	1
0	1
0	0
0	2
0	1
0	0
0	1
0	1
0	1
0	2
0	2
0	3
0	1
0	1
0	0
0	2
0	1
0	2
0	1
0	3
0	1
0	0
0	1
0	1
0	1
0	2
0	1
0	1
0	1
0	2
0	2
0	2
0	1
0	1
0	1
0	1
0	1
0	2
0	0
0	0
0	0
0	2
0	0
0	0
0	0
0	2
0	3
0	2
0	0
0	1
0	2
0	1
0	1
0	0
0	1
0	0
0	2
0	1
0	1
0	1
0	2
0	3
0	1
0	1
0	1
0	1
0	0
0	0
0	2
0	1
0	1
0	0
0	2
0	3
0	1
0	0
0	0
0	1
0	3
0	0
0	1
0	1
0	2
0	0
0	1
0	1
0	0
0	0
0	1
0	1
0	0
0	0
0	0
0	1
0	1
0	2
0	0
0	1
0	2
0	2
0	0
0	1
0	2
0	2
0	2
0	1
0	1
0	1
0	0
0	0
0	2
0	1
0	1
0	1
0	1
0	1
0	0
0	2
0	0
0	2
0	0
0	1
0	0
0	0
0	0
0	1
0	1
0	0
0	3
0	1
0	1
0	0
0	1
0	2
0	1
0	0
0	1
0	2
0	0
0	1
0	1
0	0
0	0
0	2
0	1
0	2
0	0
0	0
0	2
0	0
0	1
0	2
0	1
0	0
0	1
0	0
0	1
0	0
0	1
0	0
0	1
0	2
0	3
0	2
0	1
0	0
0	0
0	0
0	0
0	1
0	0
0	1
0	1
0	3
0	2
0	2
0	0
0	1
0	1
0	0
0	0
0	0
0	2
0	1
0	2
0	0
0	0
0	5
0	2
0	2
0	1
0	0
0	1
0	0
0	1
0	1
0	0
0	1
0	1
0	1
0	1
0	1
0	0
0	1
0	1
0	0
0	2
0	1
0	1
0	1
0	1
0	0
0	0
0	2
0	1
0	0
0	1
0	1
0	1
0	1
0	2
0	2
0	1
0	1
0	3
0	1
0	1
0	3
0	0
0	1
0	1
0	2
0	0
0	0
0	1
0	3
0	1
0	0
0	0
0	2
0	0
0	0
0	0
0	1
0	2
0	2
0	2
0	2
0	0
0	1
0	1
0	2
0	2
0	0
0	0
0	1
0	2
0	1
0	3
0	0
0	0
0	0
0	0
0	1
0	0
0	5
0	2
0	2
0	2
0	1
0	1
0	1
0	0
0	1
0	1
0	0
0	0
0	1
0	1
0	1
0	1
0	2
0	0
0	1
0	0
0	1
0	0
0	1
0	0
0	1
0	1
0	1
0	1
0	0
0	0
0	2
0	1
0	1
0	0
0	1
0	3
0	1
0	1
0	2
0	1
0	2
0	1
0	0
0	3
0	0
0	0
0	1
0	2
0	1
0	0
0	1
0	0
0	1
0	1
0	0
0	0
0	0
0	2
0	2
0	1
0	0
0	1
0	0
0	2
0	3
0	1
0	2
0	1
0	1
0	1
0	1
0	0
0	1
0	0
0	1
0	1
0	1
0	0
0	1
0	0
0	1
0	1
0	0
0	0
0	1
0	2
0	0
0	0
0	4
0	1
0	1
0	3
0	2
0	0
0	2
0	0
0	1
0	1
0	1
0	1
0	0
0	1
0	0
0	2
0	2
0	1
0	1
0	2
0	4
0	1
0	1
0	0
0	1
0	1
0	0
0	1
0	0
0	1
0	0
0	3
0	0
0	0
0	2
0	2
0	1
0	1
0	0
0	0
0	0
0	0
0	2
0	1
0	3
0	2
0	1
0	0
0	0
0	0
0	0
0	0
0	0
0	0
0	1
0	0
0	0
0	1
0	2
0	1
0	2
0	0
0	0
0	5
0	3
0	2
0	1
0	3
0	0
0	1
0	2
0	3
0	2
0	1
0	2
0	0
0	0
0	3
0	0
0	0
0	0
0	2
0	2
0	1
0	1
0	0
0	1
0	0
0	0
0	4
0	2
0	1
0	1
0	1
0	2
0	1
0	1
0	0
0	0
0	1
0	2
0	0
0	0
0	1
0	0
0	2
0	4
0	0
0	1
0	1
0	1
0	1
0	1
0	1
0	0
0	0
0	1
0	1
0	2
0	0
0	0
0	0
0	2
0	0
0	0
0	0
0	1
0	0
0	1
0	3
0	1
0	2
0	0
0	2
0	0
0	1
0	0
0	1
0	1
0	0
0	3
0	0
0	0
0	3
0	1
0	1
0	2
0	0
0	0
0	1
0	1
0	1
0	1
0	0
0	1
0	0
0	2
0	0
0	2
0	1
0	1
0	2
0	1
0	2
0	1
0	1
0	0
0	3
0	0
0	1
0	1
0	1
0	0
0	2
0	0
0	0
0	2
0	0
0	2
0	1
0	1
0	1
0	1
0	1
0	1
0	0
0	2
0	1
0	2
0	1
0	2
0	1
0	3
0	1
0	1
0	1
0	0
0	0
0	1
0	2
0	1
0	1
0	0
0	1
0	1
0	2
0	1
0	1
0	0
0	1
0	2
0	1
0	1
0	0
0	0
0	2
0	1
0	0
0	1
0	0
0	2
0	0
0	3
0	1
0	0
0	0
0	1
0	1
0	1
0	0
0	1
0	0
0	1
0	2
0	0
0	0
0	3
0	1
0	0
0	0
0	0
0	1
0	0
0	0
0	2
0	1
0	2
0	2
0	0
0	1
0	2
0	1
0	0
0	2
0	0
0	1
0	0
0	1
0	2
0	1
0	0
0	1
0	2
0	2
0	0
0	1
0	1
0	2
0	0
0	1
0	0
0	0
0	0
0	0
0	1
0	2
0	1
0	1
0	1
0	2
0	2
0	1
0	4
0	1
0	2
0	2
0	0
0	0
0	3
0	0
0	0
0	1
0	0
0	1
0	0
0	2
0	1
0	1
0	0
0	0
0	4
0	2
0	0
0	2
0	1
0	1
0	1
0	1
0	1
0	0
0	1
0	1
0	2
0	2
0	3
0	1
0	2
0	2
0	1
0	1
0	2
0	1
0	3
0	1
0	2
0	0
0	1
0	0
0	2
0	0
0	1
0	2
0	2
0	2
0	0
0	0
0	1
0	0
0	0
0	3
0	0
0	1
0	0
0	0
0	1
0	0
0	1
0	1
0	0
0	1
0	0
0	1
0	2
0	1
0	0
0	0
0	0
0	0
0	1
0	1
0	0
0	1
0	2
0	1
0	1
0	0
0	0
0	3
0	1
0	0
0	0
0	2
0	2
0	0
0	0
0	0
0	1
0	1
0	2
0	0
0	0
0	1
0	2
0	1
0	1
0	1
0	0
0	1
0	0
0	0
0	0
0	0
0	0
0	2
0	0
0	1
0	1
0	0
0	1
0	0
0	3
0	0
0	0
0	2
0	1
0	2
0	0
0	3
0	1
0	3
0	0
0	0
0	1
0	1
0	5
0	2
0	1
0	1
0	1
0	0
0	5
0	3
0	0
0	1
0	1
0	1
0	0
0	2
0	0
0	1
0	0
0	1
0	0
0	0
0	1
0	1
0	1
0	1
0	0
0	2
0	0
0	2
0	0
0	1
0	0
0	1
0	0
0	0
0	0
0	1
0	0
0	0
0	1
0	1
0	1
0	0
0	1
0	1
0	1
0	2
0	1
0	1
0	0
0	0
0	1
0	2
0	1
0	1
0	0
0	3
0	1
0	0
0	1
0	1
0	2
0	1
0	2
0	1
0	0
0	1
0	0
0	1
0	0
0	0
0	2
0	0
0	2
0	4
0	1
0	2
0	2
0	1
0	3
0	2
0	1
0	0
0	1
0	1
0	0
0	0
0	1
0	0
0	1
0	0
0	0
0	1
0	0
0	1
0	1
0	0
0	1
0	1
0	1
0	0
0	0
0	1
0	2
0	1
0	1
0	0
0	1
0	0
0	2
0	1
0	0
0	1
0	2
0	1
0	1
0	1
0	1
0	1
0	0
0	0
0	0
0	0
0	1
0	2
0	2
0	1
0	2
0	1
0	2
0	0
0	0
0	0
0	0
0	0
0	0
0	2
0	0
0	3
0	2
0	1
0	1
0	0
0	1
0	3
0	2
0	1
0	1
0	1
0	2
0	1
0	0
0	1
0	3
0	1
0	0
0	1
0	1
0	1
0	0
0	1
0	1
0	3
0	1
0	1
0	1
0	1
0	2
0	2
0	1
0	1
0	0
0	0
0	0
0	1
0	1
0	0
0	0
0	0
0	1
0	0
0	3
0	1
0	1
0	1
0	3
0	0
0	0
0	1
0	3
0	1
0	0
0	1
0	3
0	1
0	1
0	1
0	0
0	2
0	2
0	1
0	1
0	0
0	1
0	1
0	1
0	1
0	3
0	0
0	0
0	0
0	0
0	2
0	1
0	1
0	1
0	2
0	0
0	0
0	2
0	2
0	3
0	0
0	0
0	0
0	2
0	3
0	2
0	1
0	2
0	0
0	0
0	1
0	1
0	0
0	1
0	0
0	0
0	2
0	0
0	2
0	2
0	2
0	3
0	3
0	1
0	0
0	1
0	2
0	1
0	1
0	2
0	2
0	2
0	2
0	1
0	2
0	4
0	0
0	1
0	1
0	0
0	0
0	0
0	1
0	0
0	0
0	0
0	0
0	2
0	1
0	1
0	0
0	0
0	1
0	0
0	1
0	2
0	1
0	1
0	0
0	2
0	0
0	2
0	3
0	1
0	0
0	2
0	0
0	0
0	2
0	3
0	1
0	1
0	0
0	0
0	1
0	0
0	0
0	2
0	1
0	0
0	1
0	0
0	0
0	0
0	2
0	1
0	0
0	1
0	0
0	0
0	2
0	1
0	0
0	2
0	1
0	0
0	2
0	0
0	2
0	1
0	1
0	1
0	1
0	1
0	0
0	1
0	0
0	1
0	2
0	1
0	0
0	1
0	0
0	1
0	1
0	1
0	2
0	1
0	3
0	0
0	1
0	1
0	1
0	0
0	1
0	0
0	0
0	4
0	1
0	2
0	0
0	1
0	2
0	2
0	1
0	0
0	0
0	0
0	1
0	2
[truncated: 25,514 more rows]
